# Supplementary material for: Outcomes of Breast Cancer Patients Treated with Chemotherapy, Biologic Therapy, Endocrine Therapy, or Active Surveillance During the COVID-19 Pandemic
Source: PubMed Central journal article supplement — Oncologist. 2022 Feb 4;27(2):89–96. doi: 10.1093/oncolo/oyab042 (PMC8895753; doi:10.1093/oncolo/oyab042), 2022-02-04
Supplement: oyab042_suppl_supplementary_tables.pdf [file oyab042_suppl_supplementary_tables.pdf]

Supplemental Tables for:  
Outcomes of breast cancer patients treated with chemotherapy, biologic therapy, endocrine therapy, or active surveillance during the COVID-19 pandemic  
Faisal Fa'ak et al.

| <b>Chemotherapy</b> | <b>Frequency</b> |
|---------------------|------------------|
| Paclitaxel          | 94               |
| Capecitabine        | 41               |
| CMF                 | 30               |
| TCHP                | 29               |
| TCb                 | 27               |
| AC-T                | 23               |
| AC                  | 19               |
| Doxorubicin         | 19               |
| Carboplatin         | 11               |
| TC                  | 11               |

**Supplementary Table 1. Most frequently administered chemotherapy regimens.** CMF, Cyclophosphamide, Methotrexate, 5-Fluorouracil. TCHP, Docetaxel, Carboplatin, Trastuzumab, Pertuzumab. TCb, Paclitaxel, Carboplatin. AC-T, Doxorubicin, Cyclophosphamide, Paclitaxel. AC, Doxorubicin, Cyclophosphamide. TC, Docetaxel, Cyclophosphamide.

| Age | Sex | Treatment        | Cause of Death | Stage              | Location    | CCI | BMI |
|-----|-----|------------------|----------------|--------------------|-------------|-----|-----|
| 58  | F   | Not on treatment | COVID-19       | Stage III          | Long Island | 3   | 45  |
| 67  | F   | T-DM1            | COVID-19       | Metastatic Disease | Manhattan   | 11  | 30  |
| 69  | F   | AC               | COVID-19       | Stage III          | Manhattan   | 2   | 37  |
| 70  | F   | Halaven          | COVID-19       | Metastatic Disease | Manhattan   | 8   | 31  |
| 70  | F   | Not on treatment | COVID-19       | Metastatic Disease | Manhattan   | 8   | 31  |
| 75  | F   | TCHP             | COVID-19       | Stage II           | Manhattan   | 3   | 25  |
| 77  | F   | Not on treatment | COVID-19       | Stage I            | Manhattan   | 3   | 24  |
| 79  | F   | CMF              | COVID-19       | Stage III          | Manhattan   | 9   | 50  |
| 83  | F   | Faslodex, T-DM1  | COVID-19       | Metastatic Disease | Brooklyn    | 8   | 34  |
| 85  | F   | Not on treatment | COVID-19       | Stage I            | Long Island | 6   | 25  |

Supplemental Table 2. **Demographic details from patients' who expired following SARS-CoV-2 infection.**
